# Supplementary material for: Structure of the Plexin Ectodomain Bound by Semaphorin-Mimicking Antibodies
Source: PubMed Central journal article supplement (PMC4892512; doi:10.1371/journal.pone.0156719), 2016-06-03
Supplement: pone.0156719.s006.pdf [file pone.0156719.s006.pdf]

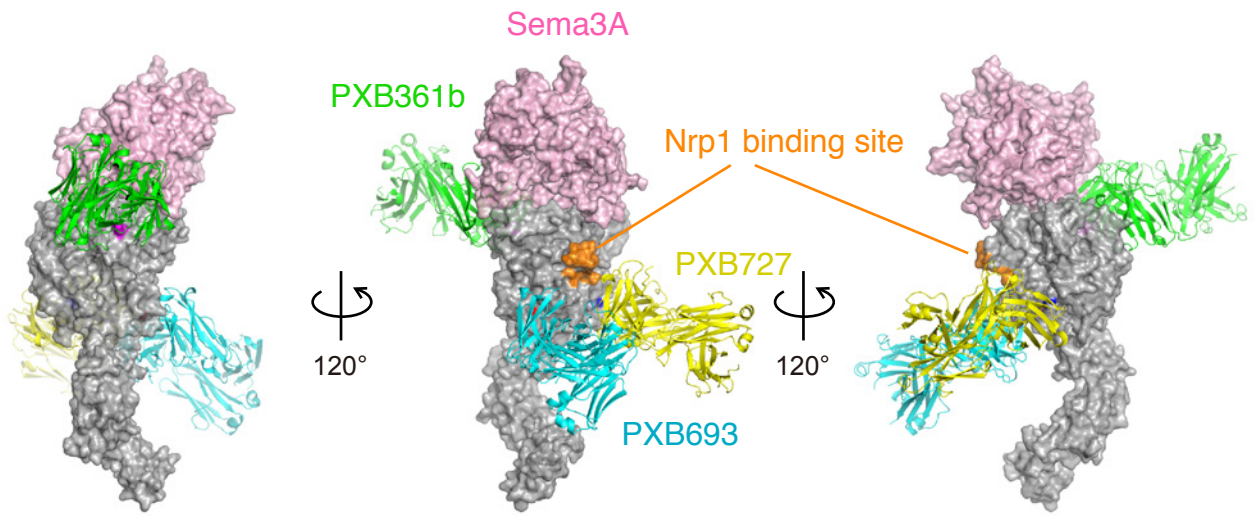

S6 Fig
